# Supplementary material
Source: MDPI journal article supplement (https://www.mdpi.com/2075-163X/13/7/882)
Supplement: s1 [file s1]

Supplementary Materials:

Table S1. LA-ICP-MS U-Pb isotopic analyses of the studied zircon megacrysts.

| Spot   | Th    | U     | Th/U | Isotopic ratio                              |                                             |                                              | Age(Ma)                                     |                                             | Weighted<br>mean<br>$^{206}\text{Pb}/^{238}\text{U}$<br>age | Concordance | Profile |
|--------|-------|-------|------|---------------------------------------------|---------------------------------------------|----------------------------------------------|---------------------------------------------|---------------------------------------------|-------------------------------------------------------------|-------------|---------|
|        | (ppm) | (ppm) |      | $^{207}\text{Pb}/^{235}\text{U}\pm 1\sigma$ | $^{206}\text{Pb}/^{238}\text{U}\pm 1\sigma$ | $^{207}\text{Pb}/^{206}\text{Pb}\pm 1\sigma$ | $^{207}\text{Pb}/^{235}\text{U}\pm 1\sigma$ | $^{206}\text{Pb}/^{238}\text{U}\pm 1\sigma$ |                                                             |             |         |
| HD-1-1 | 1989  | 1706  | 1.17 | 0.01831±0.00279                             | 0.00279±0.00002                             | 0.04790±0.00130                              | 18.4±0.5                                    | 18.0±0.2                                    | 18.2±0.4                                                    | 98          | rim     |
| HD-1-2 | 2705  | 1967  | 1.38 | 0.01873±0.00279                             | 0.00279±0.00002                             | 0.04860±0.00120                              | 18.8±0.5                                    | 17.9±0.1                                    |                                                             | 95          |         |
| HD-1-3 | 1943  | 1596  | 1.22 | 0.01803±0.00288                             | 0.00288±0.00005                             | 0.04634±0.00312                              | 18.1±1.2                                    | 18.5±0.3                                    |                                                             | 97          |         |
| HD-1-4 | 1690  | 1487  | 1.14 | 0.01914±0.00292                             | 0.00292±0.00005                             | 0.04840±0.00326                              | 19.3±1.2                                    | 18.8±0.3                                    |                                                             | 97          | core    |
| HD-1-5 | 2380  | 1742  | 1.37 | 0.01862±0.00296                             | 0.00296±0.00005                             | 0.04624±0.00282                              | 18.7±1.1                                    | 19.1±0.3                                    |                                                             | 98          |         |
| HD-1-6 | 2223  | 1655  | 1.34 | 0.01978±0.00293                             | 0.00293±0.00004                             | 0.05012±0.00316                              | 19.9±1.1                                    | 18.8±0.3                                    |                                                             | 94          |         |
| HD-1-7 | 363   | 771   | 0.47 | 0.01790±0.00279                             | 0.00279±0.00003                             | 0.04720±0.00200                              | 18.0±0.7                                    | 18.0±0.2                                    |                                                             | 100         |         |
| HD-1-8 | 361   | 711   | 0.51 | 0.01983±0.00287                             | 0.00287±0.00007                             | 0.05291±0.00521                              | 19.9±1.6                                    | 18.5±0.4                                    |                                                             | 92          | rim     |
| HD-2-1 | 234   | 291   | 0.80 | 0.01560±0.00264                             | 0.00264±0.00004                             | 0.04350±0.00330                              | 15.6±1.2                                    | 17.0±0.3                                    | 17.4±0.6                                                    | 92          | rim     |
| HD-2-2 | 16    | 61    | 0.26 | 0.01820±0.00268                             | 0.00268±0.00090                             | 0.06000±0.09000                              | 17.9±2.6                                    | 17.3±0.6                                    |                                                             | 97          |         |
| HD-2-3 | 15    | 59    | 0.26 | 0.01671±0.00269                             | 0.00269±0.00022                             | 0.01944±0.00997                              | 16.8±3.9                                    | 17.3±1.4                                    |                                                             | 96          |         |
| HD-2-4 | 170   | 240   | 0.71 | 0.01920±0.00277                             | 0.00277±0.00010                             | 0.05280±0.00894                              | 19.3±2.5                                    | 17.8±0.6                                    |                                                             | 92          | core    |
| HD-2-5 | 304   | 325   | 0.93 | 0.01662±0.00275                             | 0.00275±0.00008                             | 0.05065±0.00924                              | 16.7±2.1                                    | 17.7±0.5                                    |                                                             | 94          |         |
| HD-2-6 | 37    | 97    | 0.38 | 0.02067±0.00308                             | 0.00308±0.00017                             | 0.06279±0.01902                              | 20.8±3.9                                    | 19.8±1.1                                    |                                                             | 95          |         |
| HD-2-7 | 23    | 75    | 0.31 | 0.01893±0.00271                             | 0.00271±0.00018                             | 0.05422±0.02303                              | 19.0±10.9                                   | 17.4±1.1                                    |                                                             | 91          | rim     |
| HD-3-1 | 23    | 51    | 0.46 | 0.01910±0.00272                             | 0.00272±0.00010                             | 0.06000±0.01100                              | 18.6±3.2                                    | 17.5±0.6                                    | 17.6±0.8                                                    | 94          | rim     |
| HD-3-2 | 34    | 64    | 0.52 | 0.01707±0.00266                             | 0.00266±0.00018                             | 0.00141±0.00016                              | 17.2±2.7                                    | 17.1±1.1                                    |                                                             | 99          |         |
| HD-3-3 | 20    | 44    | 0.46 | 0.01748±0.00261                             | 0.00261±0.00022                             | 0.00148±0.00013                              | 17.6±2.2                                    | 16.8±1.4                                    |                                                             | 95          | core    |
| HD-3-4 | 26    | 57    | 0.46 | 0.01711±0.00275                             | 0.00275±0.00019                             | 0.00119±0.00013                              | 17.2±2.9                                    | 17.7±1.2                                    |                                                             | 97          |         |
| HD-3-5 | 16    | 41    | 0.39 | 0.02033±0.00295                             | 0.00295±0.00024                             | 0.06460±0.03180                              | 20.4±13.8                                   | 19.0±1.5                                    |                                                             | 92          |         |
| HD-3-6 | 20    | 44    | 0.46 | 0.01642±0.00281                             | 0.00281±0.00016                             | 0.04885±0.02576                              | 16.5±9.1                                    | 18.1±1.0                                    |                                                             | 91          | rim     |
| HD-4-1 | 1290  | 957   | 1.35 | 0.01780±0.00270                             | 0.00270±0.00003                             | 0.04790±0.00300                              | 17.9±1.1                                    | 17.4±0.2                                    | 17.5±0.3                                                    | 97          | rim     |
| HD-4-2 | 1148  | 882   | 1.30 | 0.01924±0.00278                             | 0.00278±0.00007                             | 0.05330±0.00518                              | 19.4±1.4                                    | 17.9±0.5                                    |                                                             | 92          |         |
| HD-4-3 | 491   | 801   | 0.61 | 0.01796±0.00281                             | 0.00281±0.00006                             | 0.04769±0.00477                              | 18.1±1.5                                    | 18.1±0.4                                    |                                                             | 99          | core    |
| HD-4-4 | 324   | 601   | 0.54 | 0.01690±0.00265                             | 0.00265±0.00006                             | 0.04350±0.00430                              | 16.9±1.8                                    | 17.1±0.4                                    |                                                             | 99          |         |
| HD-4-5 | 27    | 123   | 0.22 | 0.01800±0.00270                             | 0.00270±0.00006                             | 0.04940±0.00460                              | 17.9±1.6                                    | 17.4±0.4                                    |                                                             | 97          |         |
| HD-4-6 | 25    | 186   | 0.18 | 0.02094±0.00419                             | 0.00274±0.00013                             | 0.04672±0.01056                              | 21.1±4.2                                    | 17.6±0.8                                    |                                                             | 95          |         |
| HD-4-7 | 18    | 94    | 0.19 | 0.01937±0.00296                             | 0.00296±0.00017                             | 0.07730±0.02966                              | 19.5±2.9                                    | 19.1±1.1                                    |                                                             | 97          | rim     |
| HD-5-1 | 50    | 112   | 0.45 | 0.01870±0.00268                             | 0.00268±0.00007                             | 0.05500±0.00700                              | 18.6±2.3                                    | 17.2±0.5                                    | 17.6±0.8                                                    | 92          | rim     |
| HD-5-2 | 56    | 118   | 0.48 | 0.01550±0.00267                             | 0.00267±0.00007                             | 0.04600±0.00550                              | 15.5±1.8                                    | 17.2±0.4                                    |                                                             | 90          |         |
| HD-5-3 | 31    | 96    | 0.32 | 0.02041±0.00296                             | 0.00296±0.00017                             | 0.05471±0.01650                              | 20.5±4.1                                    | 19.0±1.1                                    |                                                             | 92          |         |
| HD-5-4 | 46    | 116   | 0.40 | 0.01841±0.00282                             | 0.00282±0.00012                             | 0.06922±0.02493                              | 18.5±3.8                                    | 18.1±0.8                                    |                                                             | 97          | core    |
| HD-5-5 | 40    | 103   | 0.39 | 0.01835±0.00302                             | 0.00302±0.00020                             | 0.07015±0.02524                              | 18.5±5.7                                    | 19.4±1.3                                    |                                                             | 94          |         |
| HD-5-6 | 84    | 165   | 0.51 | 0.01584±0.00273                             | 0.00273±0.00013                             | 0.06812±0.01889                              | 16.0±2.7                                    | 17.6±0.8                                    |                                                             | 90          |         |
| HD-5-7 | 39    | 101   | 0.38 | 0.01913±0.00306                             | 0.00306±0.00017                             | 0.05457±0.01708                              | 19.2±4.0                                    | 19.7±1.1                                    |                                                             | 97          | rim     |
| HD-6-1 | 43    | 69    | 0.61 | 0.01860±0.00277                             | 0.00277±0.00009                             | 0.05100±0.00800                              | 18.3±2.6                                    | 17.8±1.1                                    | 18.2±0.8                                                    | 97          | rim     |
| HD-6-2 | 69    | 104   | 0.67 | 0.01830±0.00282                             | 0.00282±0.00007                             | 0.04500±0.00500                              | 18.2±2.0                                    | 18.2±0.9                                    |                                                             | 100         |         |
| HD-6-3 | 21    | 51    | 0.41 | 0.01814±0.00266                             | 0.00266±0.00018                             | 0.06021±0.02799                              | 18.3±10.0                                   | 17.2±1.2                                    |                                                             | 93          |         |
| HD-6-4 | 43    | 70    | 0.62 | 0.02052±0.00297                             | 0.00297±0.00020                             | 0.04671±0.01808                              | 20.6±2.3                                    | 19.1±1.3                                    |                                                             | 92          | core    |
| HD-6-5 | 43    | 71    | 0.60 | 0.02025±0.00308                             | 0.00308±0.00021                             | 0.05574±0.01565                              | 20.4±3.1                                    | 19.8±1.3                                    |                                                             | 97          |         |
| HD-6-6 | 50    | 78    | 0.65 | 0.01748±0.00279                             | 0.00279±0.00018                             | 0.05581±0.02005                              | 17.6±1.7                                    | 18.0±1.2                                    |                                                             | 97          |         |
| HD-6-7 | 19    | 47    | 0.40 | 0.01684±0.00287                             | 0.00287±0.00033                             | 0.06901±0.05124                              | 17.0±3.9                                    | 18.5±2.1                                    |                                                             | 91          |         |
| HD-6-8 | 48    | 75    | 0.64 | 0.01687±0.00279                             | 0.00279±0.00020                             | 0.09420±0.03645                              | 17.0±1.5                                    | 17.9±1.3                                    |                                                             | 94          | core    |

Table S1. (continued)

| Spot    | Th<br>(ppm) | U<br>(ppm) | Th/U | Isotopic ratio                              |                                             |                                              | Age(Ma)                                     |                                             | Weighted<br>mean<br>$^{206}\text{Pb}/^{238}\text{U}$ age | Concordance | Profile |
|---------|-------------|------------|------|---------------------------------------------|---------------------------------------------|----------------------------------------------|---------------------------------------------|---------------------------------------------|----------------------------------------------------------|-------------|---------|
|         |             |            |      | $^{207}\text{Pb}/^{235}\text{U}\pm 1\sigma$ | $^{206}\text{Pb}/^{238}\text{U}\pm 1\sigma$ | $^{207}\text{Pb}/^{206}\text{Pb}\pm 1\sigma$ | $^{207}\text{Pb}/^{235}\text{U}\pm 1\sigma$ | $^{206}\text{Pb}/^{238}\text{U}\pm 1\sigma$ |                                                          |             |         |
| HD-7-1  | 13          | 46         | 0.29 | 0.02030±0.00293                             | 0.00293±0.00012                             | 0.05900±0.01100                              | 19.8±3.3                                    | 18.8±0.7                                    | 18.1±0.7                                                 | 95          | rim     |
| HD-7-2  | 11          | 36         | 0.31 | 0.01680±0.00278                             | 0.00278±0.00012                             | 0.05200±0.01300                              | 16.2±3.6                                    | 17.9±0.8                                    |                                                          | 90          |         |
| HD-7-3  | 15          | 50         | 0.30 | 0.01630±0.00277                             | 0.00277±0.00010                             | 0.04500±0.00850                              | 15.9±2.3                                    | 17.8±0.6                                    |                                                          | 90          | core    |
| HD-7-4  | 11          | 37         | 0.30 | 0.01813±0.00268                             | 0.00268±0.00022                             | 0.01126±0.00671                              | 18.2±3.4                                    | 17.3±1.4                                    |                                                          | 94          |         |
| HD-7-5  | 10          | 32         | 0.32 | 0.01819±0.00279                             | 0.00279±0.00023                             | 0.02270±0.01464                              | 18.3±5.1                                    | 18.0±1.5                                    |                                                          | 98          |         |
| HD-7-6  | 14          | 46         | 0.30 | 0.01658±0.00275                             | 0.00275±0.00025                             | 0.03878±0.02387                              | 16.7±3.0                                    | 17.7±1.6                                    |                                                          | 94          | rim     |
| HD-8-1  | 30          | 73         | 0.40 | 0.01620±0.00273                             | 0.00273±0.00008                             | 0.04300±0.00650                              | 16.1±2.3                                    | 17.6±0.5                                    | 17.6±0.7                                                 | 91          | rim     |
| HD-8-2  | 41          | 93         | 0.44 | 0.01700±0.00266                             | 0.00266±0.00009                             | 0.04700±0.00750                              | 16.8±2.0                                    | 17.1±0.6                                    |                                                          | 98          |         |
| HD-8-3  | 28          | 70         | 0.40 | 0.01921±0.00275                             | 0.00275±0.00023                             | 0.05729±0.02812                              | 19.3±9.6                                    | 17.7±1.5                                    |                                                          | 91          |         |
| HD-8-4  | 33          | 80         | 0.42 | 0.01789±0.00273                             | 0.00273±0.00019                             | 0.09987±0.03813                              | 18.0±6.4                                    | 17.6±1.2                                    |                                                          | 97          | core    |
| HD-8-5  | 9           | 27         | 0.35 | 0.02071±0.00297                             | 0.00297±0.00031                             | 0.04662±0.02553                              | 20.8±3.6                                    | 19.1±2.0                                    |                                                          | 91          |         |
| HD-8-6  | 36          | 81         | 0.45 | 0.02092±0.00301                             | 0.00301±0.00020                             | 0.04726±0.01806                              | 21.0±1.6                                    | 19.4±1.3                                    |                                                          | 94          | rim     |
| HD-9-1  | 9           | 31         | 0.28 | 0.01770±0.00283                             | 0.00283±0.00013                             | 0.06000±0.01450                              | 18.2±3.4                                    | 18.2±0.8                                    | 17.7±1.0                                                 | 100         | rim     |
| HD-9-2  | 12          | 38         | 0.31 | 0.01883±0.00271                             | 0.00271±0.00023                             | 0.04186±0.02016                              | 18.9±3.4                                    | 17.4±1.5                                    |                                                          | 91          |         |
| HD-9-3  | 11          | 38         | 0.30 | 0.01785±0.00294                             | 0.00294±0.00029                             | 0.05262±0.03888                              | 18.0±4.7                                    | 18.9±1.9                                    |                                                          | 94          |         |
| HD-9-4  | 13          | 41         | 0.32 | 0.01516±0.00366                             | 0.00253±0.00015                             | 0.04722±0.02165                              | 15.3±3.7                                    | 16.3±1.0                                    |                                                          | 93          | core    |
| HD-9-5  | 12          | 38         | 0.31 | 0.03214±0.00372                             | 0.00284±0.00020                             | 0.06295±0.02173                              | 32.1±3.7                                    | 18.3±1.3                                    |                                                          | 45          |         |
| HD-9-6  | 10          | 34         | 0.29 | 0.04562±0.00471                             | 0.00277±0.00023                             | 0.11886±0.03357                              | 45.3±4.6                                    | 17.8±1.5                                    |                                                          | 12          | rim     |
| HD-10-1 | 26          | 57         | 0.45 | 0.01660±0.00279                             | 0.00279±0.00009                             | 0.05000±0.00800                              | 16.3±2.5                                    | 17.9±0.6                                    | 17.4±0.5                                                 | 91          | rim     |
| HD-10-2 | 73          | 112        | 0.65 | 0.01880±0.00272                             | 0.00272±0.00007                             | 0.05500±0.00600                              | 18.7±1.9                                    | 17.5±0.5                                    |                                                          | 93          |         |
| HD-10-3 | 72          | 112        | 0.64 | 0.01887±0.00269                             | 0.00269±0.00014                             | 0.38755±0.06588                              | 19.0±2.5                                    | 17.3±0.9                                    |                                                          | 91          | core    |
| HD-10-4 | 67          | 111        | 0.60 | 0.01771±0.00259                             | 0.00259±0.00012                             | 0.06451±0.01514                              | 17.8±1.6                                    | 16.6±0.8                                    |                                                          | 93          |         |
| HD-10-5 | 91          | 129        | 0.71 | 0.01550±0.00272                             | 0.00272±0.00006                             | 0.04330±0.00465                              | 15.5±1.5                                    | 17.5±0.4                                    |                                                          | 90          |         |
| HD-10-6 | 47          | 86         | 0.55 | 0.01628±0.00255                             | 0.00255±0.00013                             | 0.06177±0.01986                              | 16.7±1.1                                    | 16.4±0.9                                    |                                                          | 99          | rim     |
| HD-11-1 | 23          | 48         | 0.47 | 0.02048±0.00625                             | 0.00302±0.00020                             | 0.06642±0.02339                              | 20.6±6.2                                    | 19.4±1.3                                    | 18.2±1.3                                                 | 94          | rim     |
| HD-11-2 | 10          | 19         | 0.53 | 0.01992±0.00986                             | 0.00287±0.00030                             | 0.03312±0.01892                              | 20.0±9.8                                    | 18.5±1.9                                    |                                                          | 92          |         |
| HD-11-3 | 11          | 20         | 0.58 | 0.02723±0.01461                             | 0.00262±0.00023                             | 0.03545±0.02313                              | 27.3±14.4                                   | 16.9±1.5                                    |                                                          | 52          | core    |
| HD-11-4 | 10          | 18         | 0.57 | 0.03482±0.00552                             | 0.00301±0.00028                             | 0.04033±0.01939                              | 34.8±5.4                                    | 19.4±1.8                                    |                                                          | 43          |         |
| HD-11-5 | 7           | 16         | 0.45 | 0.03483±0.01018                             | 0.00265±0.00022                             | 0.02160±0.01372                              | 34.8±10.0                                   | 17.1±1.4                                    |                                                          | 31          | rim     |
| HD-12-1 | 16          | 42         | 0.39 | 0.01768±0.00872                             | 0.00263±0.00019                             | 0.04877±0.02426                              | 17.8±8.7                                    | 16.9±1.2                                    | 17.3±1.1                                                 | 95          | rim     |
| HD-12-2 | 9           | 23         | 0.37 | 0.01586±0.00516                             | 0.00262±0.00027                             | 0.01142±0.01142                              | 16.0±5.2                                    | 16.8±1.7                                    |                                                          | 94          |         |
| HD-12-3 | 9           | 27         | 0.35 | 0.02069±0.00955                             | 0.00295±0.00023                             | 0.05113±0.02078                              | 20.8±9.5                                    | 19.0±1.4                                    |                                                          | 90          | core    |
| HD-12-4 | 7           | 24         | 0.31 | 0.02047±0.00637                             | 0.00269±0.00021                             | 0.03125±0.01629                              | 20.6±6.3                                    | 17.3±1.3                                    |                                                          | 82          |         |
| HD-12-5 | 9           | 24         | 0.39 | 0.05413±0.01524                             | 0.00256±0.00027                             | 0.07705±0.02705                              | 53.5±14.7                                   | 16.5±1.7                                    |                                                          | -6          |         |
| HD-12-6 | 8           | 23         | 0.35 | 0.03039±0.01866                             | 0.00263±0.00023                             | 0.02837±0.01758                              | 30.4±18.4                                   | 17.0±1.5                                    |                                                          | 43          | rim     |
| HD-13-1 | 27          | 56         | 0.48 | 0.01500±0.00186                             | 0.00259±0.00015                             | 0.05978±0.01951                              | 15.1±1.9                                    | 16.6±0.9                                    | 17.2±0.7                                                 | 90          | rim     |
| HD-13-2 | 31          | 57         | 0.54 | 0.01685±0.00783                             | 0.00259±0.00020                             | 0.07416±0.03444                              | 17.0±7.8                                    | 16.7±1.3                                    |                                                          | 98          |         |
| HD-13-3 | 47          | 81         | 0.58 | 0.01802±0.00300                             | 0.00262±0.00016                             | 0.05124±0.01646                              | 18.1±3.0                                    | 16.8±1.0                                    |                                                          | 92          |         |
| HD-13-4 | 51          | 86         | 0.60 | 0.01921±0.00356                             | 0.00287±0.00018                             | 0.06135±0.01946                              | 19.3±3.5                                    | 18.5±1.2                                    |                                                          | 95          | core    |
| HD-13-5 | 221         | 204        | 1.08 | 0.01542±0.00192                             | 0.00264±0.00010                             | 0.05113±0.01031                              | 15.5±1.9                                    | 17.0±0.7                                    |                                                          | 91          |         |
| HD-13-6 | 62          | 98         | 0.63 | 0.01739±0.00286                             | 0.00257±0.00012                             | 0.06528±0.01549                              | 17.5±2.9                                    | 16.6±0.8                                    |                                                          | 94          |         |
| HD-13-7 | 77          | 108        | 0.72 | 0.01738±0.00681                             | 0.00286±0.00013                             | 0.06657±0.02197                              | 17.5±6.8                                    | 18.4±0.8                                    |                                                          | 94          | rim     |

| Spot    | Th<br>(ppm) | U<br>(ppm) | Th/U | Isotopic ratio                         |                                        |                                         | Age(Ma)                                |                                        | Weighted mean<br><sup>206</sup> Pb/ <sup>238</sup> U age | Concordance | Profile |
|---------|-------------|------------|------|----------------------------------------|----------------------------------------|-----------------------------------------|----------------------------------------|----------------------------------------|----------------------------------------------------------|-------------|---------|
|         |             |            |      | <sup>207</sup> Pb/ <sup>235</sup> U±1σ | <sup>206</sup> Pb/ <sup>238</sup> U±1σ | <sup>207</sup> Pb/ <sup>206</sup> Pb±1σ | <sup>207</sup> Pb/ <sup>235</sup> U±1σ | <sup>206</sup> Pb/ <sup>238</sup> U±1σ |                                                          |             |         |
| HD-14-1 | 20          | 58         | 0.35 | 0.01693±0.00227                        | 0.00290±0.00020                        | 0.06384±0.02140                         | 17.0±2.3                               | 18.7±1.3                               | 18.2±1.0                                                 | 90          | rim     |
| HD-14-2 | 24          | 65         | 0.37 | 0.01855±0.00214                        | 0.00290±0.00019                        | 0.05887±0.01781                         | 18.7±2.1                               | 18.7±1.2                               |                                                          | 99          |         |
| HD-14-3 | 19          | 61         | 0.30 | 0.01699±0.01029                        | 0.00291±0.00018                        | 0.05218±0.02453                         | 17.1±10.3                              | 18.8±1.1                               |                                                          | 90          | core    |
| HD-14-4 | 22          | 66         | 0.33 | 0.01875±0.00575                        | 0.00266±0.00017                        | 0.04879±0.01573                         | 18.9±5.7                               | 17.1±1.1                               |                                                          | 90          |         |
| HD-14-5 | 16          | 51         | 0.32 | 0.01636±0.00211                        | 0.00274±0.00018                        | 0.04920±0.01865                         | 16.5±2.1                               | 17.6±1.1                               |                                                          | 93          |         |
| HD-14-6 | 11          | 36         | 0.32 | 0.02285±0.11089                        | 0.00302±0.00030                        | 0.03945±0.01712                         | 22.9±11.0                              | 19.5±2.0                               |                                                          | 83          | rim     |
| HD-15-1 | 18          | 42         | 0.42 | 0.02060±0.00830                        | 0.00293±0.00020                        | 0.04616±0.01759                         | 20.7±8.3                               | 18.8±1.3                               | 18.6±1.1                                                 | 90          | rim     |
| HD-15-2 | 26          | 66         | 0.40 | 0.01983±0.00210                        | 0.00301±0.00018                        | 0.08327±0.02602                         | 19.9±2.1                               | 19.4±1.2                               |                                                          | 97          |         |
| HD-15-3 | 12          | 38         | 0.32 | 0.01948±0.00279                        | 0.00283±0.00022                        | 0.05345±0.01937                         | 19.6±2.8                               | 18.2±1.4                               |                                                          | 92          |         |
| HD-15-4 | 25          | 69         | 0.36 | 0.01636±0.00358                        | 0.00282±0.00019                        | 0.06187±0.02079                         | 16.5±3.6                               | 18.2±1.2                               |                                                          | 90          | core    |
| HD-15-5 | 22          | 53         | 0.41 | 0.01912±0.00203                        | 0.00275±0.00020                        | 0.05563±0.02314                         | 19.2±2.0                               | 17.7±1.3                               |                                                          | 91          |         |
| HD-15-6 | 15          | 33         | 0.44 | 0.03432±0.00545                        | 0.00297±0.00025                        | 0.05271±0.02089                         | 34.3±5.4                               | 19.2±1.6                               |                                                          | 43          | rim     |
| HD-16-1 | 26          | 45         | 0.59 | 0.01672±0.00381                        | 0.00257±0.00022                        | 0.05318±0.02306                         | 16.8±3.8                               | 16.5±1.4                               | 17.1±1.0                                                 | 98          | rim     |
| HD-16-2 | 19          | 35         | 0.54 | 0.01742±0.00335                        | 0.00263±0.00023                        | 0.03897±0.01825                         | 17.5±3.3                               | 16.9±1.5                               |                                                          | 96          |         |
| HD-16-3 | 56          | 62         | 0.90 | 0.01675±0.00169                        | 0.00280±0.00020                        | 0.05180±0.01903                         | 16.9±1.7                               | 18.0±1.3                               |                                                          | 93          |         |
| HD-16-4 | 51          | 60         | 0.85 | 0.01962±0.00455                        | 0.00283±0.00017                        | 0.07709±0.02302                         | 19.7±4.5                               | 18.2±1.1                               |                                                          | 91          | core    |
| HD-16-5 | 27          | 35         | 0.78 | 0.02006±0.01007                        | 0.00252±0.00021                        | 0.02511±0.01352                         | 20.2±10.0                              | 16.2±1.3                               |                                                          | 78          |         |
| HD-16-6 | 60          | 66         | 0.90 | 0.02490±0.00317                        | 0.00252±0.00017                        | 0.06533±0.02193                         | 25.0±3.1                               | 16.2±1.1                               |                                                          | 57          | rim     |

**Table S2.** Lu-Hf isotope composition of the studied zircon megacrysts

| Spot    | $^{176}\text{Hf}/^{177}\text{Hf}$ | 1 SE     | $^{176}\text{Lu}/^{177}\text{Hf}$ | $^{176}\text{Yb}/^{177}\text{Hf}$ | $\epsilon_{\text{Hf}}(\text{t})$ | 1 SE | $T_{\text{DM}}$ | $T_{\text{crustal}}$ | Profile |
|---------|-----------------------------------|----------|-----------------------------------|-----------------------------------|----------------------------------|------|-----------------|----------------------|---------|
| HD-1-1  | 0.282975                          | 0.000022 | 0.005247                          | 0.019680                          | 7.5                              | 0.8  | 442             | 618                  | rim     |
| HD-1-2  | 0.282898                          | 0.000023 | 0.003315                          | 0.092450                          | 4.8                              | 0.8  | 535             | 791                  |         |
| HD-1-3  | 0.282983                          | 0.000024 | 0.006500                          | 0.159220                          | 7.8                              | 0.8  | 446             | 601                  | core    |
| HD-1-4  | 0.282921                          | 0.000013 | 0.000548                          | 0.018271                          | 5.7                              | 0.5  | 464             | 737                  |         |
| HD-1-5  | 0.282936                          | 0.000020 | 0.008561                          | 0.322653                          | 6.1                              | 0.7  | 560             | 708                  | rim     |
| HD-2-1  | 0.282898                          | 0.000019 | 0.000752                          | 0.019009                          | 4.8                              | 0.7  | 498             | 789                  | rim     |
| HD-2-2  | 0.282941                          | 0.000018 | 0.000391                          | 0.009100                          | 6.4                              | 0.6  | 434             | 692                  |         |
| HD-2-3  | 0.282913                          | 0.000021 | 0.000416                          | 0.008772                          | 5.4                              | 0.7  | 473             | 755                  | core    |
| HD-2-4  | 0.282935                          | 0.000014 | 0.000714                          | 0.027132                          | 6.1                              | 0.5  | 446             | 706                  |         |
| HD-2-5  | 0.282928                          | 0.000012 | 0.000447                          | 0.016765                          | 5.9                              | 0.4  | 452             | 721                  | rim     |
| HD-3-1  | 0.282945                          | 0.000023 | 0.000588                          | 0.013813                          | 6.5                              | 0.8  | 430             | 683                  | rim     |
| HD-3-2  | 0.282910                          | 0.000020 | 0.000743                          | 0.017168                          | 5.3                              | 0.7  | 481             | 762                  |         |
| HD-3-3  | 0.282951                          | 0.000016 | 0.000465                          | 0.011144                          | 6.7                              | 0.6  | 421             | 669                  | core    |
| HD-3-4  | 0.282908                          | 0.000012 | 0.000621                          | 0.023646                          | 5.2                              | 0.4  | 483             | 767                  |         |
| HD-3-5  | 0.282923                          | 0.000013 | 0.000580                          | 0.021233                          | 5.7                              | 0.5  | 461             | 733                  | rim     |
| HD-4-1  | 0.282952                          | 0.000011 | 0.000327                          | 0.007783                          | 6.8                              | 0.4  | 418             | 667                  | rim     |
| HD-4-2  | 0.282955                          | 0.000013 | 0.001025                          | 0.026926                          | 6.9                              | 0.5  | 421             | 660                  |         |
| HD-4-3  | 0.282937                          | 0.000014 | 0.000939                          | 0.025763                          | 6.2                              | 0.5  | 446             | 701                  | core    |
| HD-4-4  | 0.282953                          | 0.000015 | 0.001521                          | 0.071839                          | 6.8                              | 0.5  | 429             | 665                  |         |
| HD-4-5  | 0.282941                          | 0.000012 | 0.001085                          | 0.046855                          | 6.3                              | 0.4  | 442             | 693                  | rim     |
| HD-5-1  | 0.282932                          | 0.000020 | 0.000549                          | 0.013833                          | 6.0                              | 0.7  | 448             | 712                  | rim     |
| HD-5-2  | 0.282967                          | 0.000019 | 0.000393                          | 0.009621                          | 7.3                              | 0.7  | 397             | 633                  |         |
| HD-5-3  | 0.282986                          | 0.000022 | 0.000532                          | 0.013226                          | 8.0                              | 0.8  | 372             | 590                  | core    |
| HD-5-4  | 0.282934                          | 0.000016 | 0.000674                          | 0.027203                          | 6.1                              | 0.6  | 446             | 707                  |         |
| HD-5-5  | 0.282963                          | 0.000015 | 0.000715                          | 0.028491                          | 7.1                              | 0.5  | 407             | 642                  | rim     |
| HD-6-1  | 0.282898                          | 0.000020 | 0.000739                          | 0.017658                          | 4.8                              | 0.7  | 498             | 789                  | rim     |
| HD-6-2  | 0.282933                          | 0.000020 | 0.000993                          | 0.024805                          | 6.1                              | 0.7  | 452             | 710                  |         |
| HD-6-3  | 0.282987                          | 0.000020 | 0.000808                          | 0.019270                          | 8.0                              | 0.7  | 373             | 588                  | core    |
| HD-6-4  | 0.282923                          | 0.000015 | 0.001114                          | 0.046387                          | 5.7                              | 0.5  | 468             | 734                  |         |
| HD-6-5  | 0.282932                          | 0.000014 | 0.000956                          | 0.037870                          | 6.1                              | 0.5  | 452             | 711                  | rim     |
| HD-7-1  | 0.282944                          | 0.000021 | 0.000776                          | 0.017508                          | 6.5                              | 0.7  | 434             | 685                  | rim     |
| HD-7-2  | 0.282972                          | 0.000019 | 0.000637                          | 0.140290                          | 7.5                              | 0.7  | 393             | 622                  |         |
| HD-7-3  | 0.282965                          | 0.000019 | 0.000798                          | 0.018120                          | 7.2                              | 0.7  | 404             | 638                  | core    |
| HD-7-4  | 0.282954                          | 0.000015 | 0.000963                          | 0.039635                          | 6.8                              | 0.5  | 422             | 663                  |         |
| HD-7-5  | 0.282967                          | 0.000014 | 0.000426                          | 0.017014                          | 7.3                              | 0.5  | 397             | 632                  | rim     |
| HD-8-1  | 0.282927                          | 0.000020 | 0.000412                          | 0.009297                          | 5.9                              | 0.7  | 453             | 723                  | rim     |
| HD-8-2  | 0.282937                          | 0.000021 | 0.000972                          | 0.023076                          | 6.2                              | 0.7  | 446             | 701                  |         |
| HD-8-3  | 0.282985                          | 0.000019 | 0.001207                          | 0.029427                          | 7.9                              | 0.7  | 380             | 593                  | core    |
| HD-8-4  | 0.282939                          | 0.000015 | 0.001224                          | 0.051397                          | 6.3                              | 0.5  | 447             | 697                  |         |
| HD-8-5  | 0.282915                          | 0.000015 | 0.001237                          | 0.050775                          | 5.4                              | 0.5  | 480             | 750                  | rim     |
| HD-9-1  | 0.282970                          | 0.000019 | 0.000368                          | 0.008370                          | 7.4                              | 0.7  | 393             | 626                  | rim     |
| HD-9-2  | 0.282960                          | 0.000021 | 0.000302                          | 0.006945                          | 7.0                              | 0.7  | 406             | 649                  |         |
| HD-9-3  | 0.282983                          | 0.000021 | 0.000370                          | 0.008588                          | 7.9                              | 0.7  | 375             | 597                  | core    |
| HD-9-4  | 0.282937                          | 0.000015 | 0.000455                          | 0.016242                          | 6.2                              | 0.5  | 440             | 701                  |         |
| HD-9-5  | 0.282976                          | 0.000015 | 0.000454                          | 0.016574                          | 7.6                              | 0.5  | 386             | 613                  | rim     |
| HD-10-1 | 0.283020                          | 0.000022 | 0.000444                          | 0.010792                          | 9.2                              | 0.8  | 324             | 513                  | rim     |
| HD-10-2 | 0.282920                          | 0.000022 | 0.000711                          | 0.017884                          | 5.6                              | 0.8  | 467             | 739                  |         |

**Table S2.** (continued)

| Spot    | $^{176}\text{Hf}/^{177}\text{Hf}$ | 1 SE     | $^{176}\text{Lu}/^{177}\text{Hf}$ | $^{176}\text{Yb}/^{177}\text{Hf}$ | $\epsilon_{\text{Hf}}(t)$ | 1 SE | T <sub>DM</sub> | T <sub>crustal</sub> | Profile |
|---------|-----------------------------------|----------|-----------------------------------|-----------------------------------|---------------------------|------|-----------------|----------------------|---------|
| HD-10-3 | 0.282981                          | 0.000022 | 0.000703                          | 0.017616                          | 7.8                       | 0.8  | 381             | 601                  | core    |
| HD-10-4 | 0.282960                          | 0.000015 | 0.000772                          | 0.032342                          | 7.0                       | 0.5  | 411             | 649                  |         |
| HD-10-5 | 0.282920                          | 0.000015 | 0.000746                          | 0.031495                          | 5.6                       | 0.5  | 468             | 740                  | rim     |
| HD-11-1 | 0.282933                          | 0.000016 | 0.000206                          | 0.010590                          | 6.1                       | 0.6  | 442             | 709                  | rim     |
| HD-11-2 | 0.282963                          | 0.000016 | 0.000203                          | 0.010139                          | 7.2                       | 0.6  | 400             | 641                  |         |
| HD-11-3 | 0.282952                          | 0.000017 | 0.000268                          | 0.012684                          | 6.7                       | 0.6  | 417             | 667                  | core    |
| HD-11-4 | 0.282969                          | 0.000017 | 0.000280                          | 0.013089                          | 7.4                       | 0.6  | 393             | 628                  |         |
| HD-11-5 | 0.282972                          | 0.000016 | 0.000219                          | 0.010754                          | 7.5                       | 0.6  | 388             | 621                  | rim     |
| HD-12-1 | 0.282951                          | 0.000014 | 0.000366                          | 0.015992                          | 6.7                       | 0.5  | 419             | 668                  | rim     |
| HD-12-2 | 0.282937                          | 0.000014 | 0.000373                          | 0.016111                          | 6.2                       | 0.5  | 439             | 700                  |         |
| HD-12-3 | 0.282938                          | 0.000015 | 0.000361                          | 0.015495                          | 6.3                       | 0.5  | 438             | 699                  | core    |
| HD-12-4 | 0.282948                          | 0.000015 | 0.000351                          | 0.014991                          | 6.6                       | 0.5  | 423             | 675                  |         |
| HD-12-5 | 0.282950                          | 0.000015 | 0.000381                          | 0.016201                          | 6.7                       | 0.5  | 420             | 670                  | rim     |
| HD-13-1 | 0.282944                          | 0.000014 | 0.001372                          | 0.055832                          | 6.5                       | 0.5  | 440             | 685                  | rim     |
| HD-13-2 | 0.282948                          | 0.000015 | 0.001117                          | 0.044818                          | 6.6                       | 0.5  | 431             | 675                  |         |
| HD-13-3 | 0.282959                          | 0.000014 | 0.001260                          | 0.054597                          | 7.0                       | 0.5  | 418             | 652                  | core    |
| HD-13-4 | 0.282964                          | 0.000014 | 0.001244                          | 0.054181                          | 7.2                       | 0.5  | 410             | 640                  |         |
| HD-13-5 | 0.282958                          | 0.000015 | 0.001410                          | 0.062265                          | 7.0                       | 0.5  | 421             | 653                  | rim     |
| HD-14-1 | 0.282929                          | 0.000015 | 0.000821                          | 0.035586                          | 5.9                       | 0.5  | 456             | 720                  | rim     |
| HD-14-2 | 0.282923                          | 0.000014 | 0.000882                          | 0.038277                          | 5.7                       | 0.5  | 465             | 733                  |         |
| HD-14-3 | 0.282932                          | 0.000015 | 0.000936                          | 0.039639                          | 6.0                       | 0.5  | 453             | 712                  | core    |
| HD-14-4 | 0.282967                          | 0.000015 | 0.000826                          | 0.034530                          | 7.3                       | 0.5  | 401             | 632                  |         |
| HD-14-5 | 0.282943                          | 0.000013 | 0.000984                          | 0.042468                          | 6.4                       | 0.5  | 438             | 688                  | rim     |
| HD-15-1 | 0.282946                          | 0.000014 | 0.000343                          | 0.014987                          | 6.5                       | 0.5  | 426             | 680                  | rim     |
| HD-15-2 | 0.282909                          | 0.000013 | 0.000449                          | 0.019758                          | 5.2                       | 0.5  | 479             | 763                  |         |
| HD-15-3 | 0.282933                          | 0.000013 | 0.000416                          | 0.018574                          | 6.1                       | 0.5  | 445             | 710                  | core    |
| HD-15-4 | 0.282932                          | 0.000012 | 0.000289                          | 0.012857                          | 6.0                       | 0.4  | 446             | 713                  |         |
| HD-15-5 | 0.282931                          | 0.000012 | 0.000369                          | 0.015732                          | 6.0                       | 0.4  | 448             | 715                  | rim     |
| HD-16-1 | 0.282940                          | 0.000015 | 0.000795                          | 0.036402                          | 6.3                       | 0.5  | 440             | 695                  | rim     |
| HD-16-2 | 0.282950                          | 0.000015 | 0.000920                          | 0.041820                          | 6.7                       | 0.5  | 427             | 672                  |         |
| HD-16-3 | 0.282949                          | 0.000017 | 0.000936                          | 0.042228                          | 6.6                       | 0.6  | 429             | 674                  | core    |
| HD-16-4 | 0.282951                          | 0.000016 | 0.000790                          | 0.033766                          | 6.7                       | 0.6  | 425             | 670                  |         |
| HD-16-5 | 0.282931                          | 0.000017 | 0.000797                          | 0.035361                          | 6.0                       | 0.6  | 453             | 715                  | rim     |

**Table S3.** Trace element (ppm) composition of studied zircon megacrysts

| Locality<br>Spot | HD-1 (Dark park) |          |          |          |          |          |          | HD-1 (Bright park) |          |          |
|------------------|------------------|----------|----------|----------|----------|----------|----------|--------------------|----------|----------|
|                  | HD-1-1           | HD-1-2   | HD-1-3   | HD-1-4   | HD-1-5   | HD-1-6   | Average  | HD-1-7             | HD-1-8   | Average  |
| La               | 0.427            | 1.263    | 0.415    | 0.415    | 1.109    | 1.701    | 0.888    | 0.000              | 0.081    | 0.040    |
| Ce               | 34.960           | 52.500   | 33.098   | 30.000   | 47.196   | 27.759   | 37.586   | 8.220              | 7.822    | 8.021    |
| Pr               | 2.486            | 4.860    | 2.354    | 2.008    | 4.085    | 3.656    | 3.242    | 0.213              | 0.224    | 0.218    |
| Nd               | 27.670           | 44.900   | 27.827   | 25.057   | 39.042   | 35.402   | 33.316   | 3.290              | 3.379    | 3.334    |
| Sm               | 39.040           | 41.890   | 37.072   | 34.534   | 36.884   | 32.353   | 36.962   | 8.080              | 6.549    | 7.315    |
| Eu               | 14.160           | 13.060   | 13.886   | 12.988   | 11.969   | 10.609   | 12.779   | 3.520              | 3.348    | 3.434    |
| Gd               | 153.900          | 129.800  | 141.184  | 131.991  | 114.770  | 104.739  | 129.397  | 50.760             | 44.617   | 47.688   |
| Tb               | 50.710           | 38.690   | 48.529   | 45.631   | 34.718   | 33.593   | 41.978   | 21.190             | 19.302   | 20.246   |
| Dy               | 575.000          | 412.100  | 517.060  | 481.939  | 354.351  | 353.701  | 449.025  | 303.700            | 259.418  | 281.559  |
| Ho               | 181.000          | 125.400  | 164.808  | 154.537  | 111.118  | 116.759  | 142.270  | 123.300            | 109.655  | 116.478  |
| Er               | 779.600          | 524.300  | 660.770  | 618.733  | 436.682  | 477.378  | 582.911  | 650.400            | 538.230  | 594.315  |
| Tm               | 156.400          | 103.500  | 135.641  | 127.891  | 87.523   | 99.915   | 118.478  | 148.100            | 126.406  | 137.253  |
| Yb               | 1322.000         | 863.900  | 1192.137 | 1114.949 | 758.578  | 890.079  | 1023.607 | 1379.000           | 1225.451 | 1302.226 |
| Lu               | 224.400          | 146.800  | 205.358  | 194.442  | 132.020  | 161.389  | 177.401  | 268.700            | 252.088  | 260.394  |
| Y                | 4738.000         | 3373.000 | 4061.484 | 3833.196 | 2842.710 | 3019.309 | 3644.616 | 3506.000           | 2933.601 | 3219.800 |
| Nb               | 25.710           | 45.310   | 22.156   | 20.442   | 34.480   | 38.382   | 31.080   | 7.430              | 5.977    | 6.704    |
| Ta               | 3.325            | 16.420   | 2.823    | 2.678    | 13.875   | 13.762   | 8.814    | 3.515              | 2.734    | 3.124    |
| Ti               | 0.500            | 1.070    | 0.236    | 0.000    | 0.857    | 1.707    | 0.728    | 0.350              | 0.284    | 0.317    |
| Hf               | 6119.000         | 6595.000 | 5356.673 | 5361.315 | 5850.736 | 5639.687 | 5820.402 | 6047.000           | 4916.493 | 5481.747 |
| Th               | 1989.000         | 2705.000 | 1942.866 | 1690.174 | 2380.191 | 2222.762 | 2154.999 | 362.800            | 361.363  | 362.081  |
| U                | 1706.000         | 1967.000 | 1596.463 | 1486.862 | 1742.345 | 1654.703 | 1692.229 | 770.900            | 710.998  | 740.949  |
| ΣREE             | 3561.753         | 2502.963 | 3180.140 | 2975.112 | 2170.047 | 2349.034 | 2789.841 | 2968.473           | 2596.569 | 2782.521 |
| Th/U             | 1.17             | 1.38     | 1.22     | 1.14     | 1.37     | 1.34     | 1.27     | 0.47               | 0.51     | 0.49     |
| Th/Y             | 0.42             | 0.80     | 0.48     | 0.44     | 0.84     | 0.74     | 0.59     | 0.10               | 0.12     | 0.11     |
| Eu/Eu*           | 0.56             | 0.54     | 0.59     | 0.59     | 0.56     | 0.56     | 0.56     | 0.53               | 0.60     | 0.56     |

Table S3. (continued)

| Locality Spot | HD-2     |          |          |          |          |          |          |          | HD-3     |          |          |          |          |          |          |
|---------------|----------|----------|----------|----------|----------|----------|----------|----------|----------|----------|----------|----------|----------|----------|----------|
|               | HD-2-1   | HD-2-2   | HD-2-3   | HD-2-4   | HD-2-5   | HD-2-6   | HD-2-7   | Average  | HD-3-1   | HD-3-2   | HD-3-3   | HD-3-4   | HD-3-5   | HD-3-6   | Average  |
| La            | 0.000    | 0.000    | 0.000    | 0.000    | 0.000    | 0.000    | 0.004    | 0.001    | 0.000    | 0.005    | 0.006    | 0.000    | 0.000    | 0.003    | 0.002    |
| Ce            | 1.157    | 0.345    | 0.332    | 0.927    | 1.446    | 0.392    | 0.389    | 0.713    | 0.539    | 0.870    | 0.708    | 0.589    | 0.685    | 0.595    | 0.664    |
| Pr            | 0.024    | 0.014    | 0.009    | 0.032    | 0.049    | 0.004    | 0.000    | 0.019    | 0.009    | 0.013    | 0.013    | 0.012    | 0.010    | 0.027    | 0.014    |
| Nd            | 0.443    | 0.276    | 0.282    | 0.454    | 0.721    | 0.147    | 0.202    | 0.361    | 0.159    | 0.156    | 0.180    | 0.101    | 0.145    | 0.188    | 0.155    |
| Sm            | 1.220    | 0.553    | 0.420    | 0.860    | 1.427    | 0.392    | 0.519    | 0.770    | 0.422    | 0.887    | 0.539    | 0.352    | 0.616    | 0.496    | 0.552    |
| Eu            | 0.900    | 0.395    | 0.471    | 0.828    | 1.359    | 0.322    | 0.440    | 0.674    | 0.340    | 0.610    | 0.414    | 0.327    | 0.607    | 0.442    | 0.457    |
| Gd            | 8.670    | 2.560    | 2.845    | 6.608    | 11.065   | 2.795    | 2.848    | 5.342    | 3.080    | 5.420    | 3.584    | 3.231    | 3.763    | 3.128    | 3.701    |
| Tb            | 3.088    | 1.021    | 1.012    | 2.597    | 4.001    | 1.036    | 1.191    | 1.992    | 1.551    | 2.587    | 1.598    | 1.475    | 1.894    | 1.562    | 1.778    |
| Dy            | 41.620   | 13.200   | 11.702   | 34.633   | 48.180   | 15.993   | 16.054   | 25.912   | 23.410   | 34.172   | 21.301   | 22.828   | 27.254   | 20.890   | 24.976   |
| Ho            | 15.190   | 5.099    | 4.841    | 12.958   | 17.508   | 6.195    | 6.363    | 9.736    | 9.460    | 13.715   | 9.072    | 9.166    | 10.985   | 8.149    | 10.091   |
| Er            | 72.500   | 30.570   | 25.059   | 58.092   | 74.625   | 29.722   | 29.612   | 45.740   | 51.080   | 65.217   | 45.651   | 46.604   | 54.020   | 40.797   | 50.562   |
| Tm            | 15.610   | 8.130    | 6.991    | 13.115   | 16.553   | 7.037    | 7.221    | 10.665   | 12.630   | 15.341   | 11.637   | 11.677   | 12.961   | 10.280   | 12.421   |
| Yb            | 147.200  | 88.200   | 77.039   | 126.412  | 154.713  | 68.846   | 75.829   | 105.463  | 129.600  | 145.498  | 113.278  | 124.677  | 135.766  | 106.000  | 125.803  |
| Lu            | 27.910   | 19.630   | 17.940   | 25.566   | 30.454   | 14.875   | 14.824   | 21.600   | 26.280   | 29.375   | 24.030   | 25.418   | 24.824   | 20.434   | 25.060   |
| Y             | 420.300  | 154.000  | 132.651  | 349.866  | 462.427  | 167.508  | 172.929  | 265.669  | 270.400  | 366.383  | 251.902  | 256.255  | 298.282  | 230.313  | 278.923  |
| Nb            | 3.950    | 1.374    | 1.123    | 2.861    | 4.902    | 1.267    | 1.073    | 2.364    | 0.862    | 0.851    | 0.573    | 0.703    | 0.939    | 0.621    | 0.758    |
| Ta            | 2.686    | 1.453    | 1.432    | 2.197    | 3.165    | 0.967    | 1.141    | 1.863    | 0.613    | 0.563    | 0.496    | 0.640    | 0.457    | 0.384    | 0.525    |
| Ti            | 10.600   | 7.070    | 5.405    | 7.304    | 11.504   | 6.187    | 7.288    | 7.908    | 0.000    | 0.097    | 0.403    | 0.395    | 0.168    | 0.119    | 0.197    |
| Hf            | 6577.000 | 6826.000 | 6318.153 | 6256.641 | 6138.312 | 6177.637 | 5391.245 | 6240.713 | 8211.000 | 5964.309 | 6467.441 | 7568.776 | 5384.561 | 5620.660 | 6536.124 |
| Th            | 234.000  | 15.890   | 15.445   | 169.625  | 303.689  | 36.833   | 23.259   | 114.106  | 23.350   | 33.582   | 19.963   | 26.083   | 16.277   | 20.013   | 23.211   |
| U             | 291.400  | 60.640   | 58.718   | 239.717  | 324.940  | 97.313   | 74.518   | 163.892  | 51.030   | 64.001   | 43.704   | 57.045   | 41.355   | 43.706   | 50.140   |
| ΣREE          | 335.532  | 169.993  | 148.945  | 283.083  | 362.100  | 147.755  | 155.498  | 228.987  | 258.560  | 313.867  | 232.011  | 246.456  | 273.532  | 212.989  | 256.236  |
| Th/U          | 0.80     | 0.26     | 0.26     | 0.71     | 0.93     | 0.38     | 0.31     | 0.70     | 0.46     | 0.52     | 0.46     | 0.46     | 0.39     | 0.46     | 0.46     |
| Th/Y          | 0.56     | 0.10     | 0.12     | 0.48     | 0.66     | 0.22     | 0.13     | 0.43     | 0.09     | 0.09     | 0.08     | 0.10     | 0.05     | 0.09     | 0.08     |
| Eu/Eu*        | 0.85     | 1.01     | 1.32     | 1.06     | 1.05     | 0.94     | 1.11     | 1.02     | 0.91     | 0.85     | 0.91     | 0.94     | 1.22     | 1.08     | 0.98     |

**Table S3.** (continued)

| Locality<br>Spot | HD-4 (Dark park) |          |          |           |           | HD-4 (Bright park) |           |           |           | HD-5     |          |          |          |          |          |          |          |
|------------------|------------------|----------|----------|-----------|-----------|--------------------|-----------|-----------|-----------|----------|----------|----------|----------|----------|----------|----------|----------|
|                  | HD-4-1           | HD-4-2   | HD-4-3   | HD-4-4    | Average   | HD-4-5             | HD-4-6    | HD-4-7    | Average   | HD-5-1   | HD-5-2   | HD-5-3   | HD-5-4   | HD-5-5   | HD-5-6   | HD-5-7   | Average  |
| La               | 0.011            | 0.007    | 0.013    | 0.000     | 0.008     | 0.000              | 0.000     | 0.000     | 0.000     | 0.000    | 0.000    | 0.000    | 0.000    | 0.000    | 0.000    | 0.000    | 0.000    |
| Ce               | 4.110            | 3.649    | 3.241    | 1.940     | 3.235     | 0.338              | 0.432     | 0.296     | 0.355     | 0.508    | 0.532    | 0.560    | 0.504    | 0.356    | 0.691    | 0.365    | 0.502    |
| Pr               | 0.164            | 0.141    | 0.229    | 0.168     | 0.175     | 0.006              | 0.016     | 0.000     | 0.007     | 0.011    | 0.010    | 0.010    | 0.018    | 0.005    | 0.010    | 0.000    | 0.009    |
| Nd               | 2.430            | 2.159    | 3.202    | 2.030     | 2.455     | 0.098              | 0.359     | 0.166     | 0.207     | 0.209    | 0.187    | 0.189    | 0.284    | 0.110    | 0.185    | 0.217    | 0.197    |
| Sm               | 6.400            | 5.472    | 6.614    | 4.480     | 5.741     | 0.414              | 0.474     | 0.232     | 0.373     | 0.590    | 0.566    | 0.683    | 0.835    | 0.672    | 0.798    | 0.581    | 0.675    |
| Eu               | 4.000            | 3.607    | 4.466    | 3.070     | 3.786     | 0.321              | 0.392     | 0.148     | 0.287     | 0.453    | 0.473    | 0.596    | 0.688    | 0.520    | 0.624    | 0.424    | 0.540    |
| Gd               | 37.500           | 30.369   | 35.011   | 25.900    | 32.195    | 3.510              | 3.786     | 2.081     | 3.125     | 4.330    | 4.570    | 5.058    | 3.876    | 4.138    | 5.005    | 3.633    | 4.373    |
| Tb               | 13.540           | 11.383   | 14.027   | 10.080    | 12.258    | 1.737              | 1.365     | 1.204     | 1.435     | 1.847    | 1.946    | 2.160    | 1.846    | 1.526    | 2.223    | 1.531    | 1.868    |
| Dy               | 163.900          | 134.995  | 162.653  | 129.400   | 147.737   | 27.980             | 24.187    | 16.268    | 22.812    | 25.450   | 26.400   | 29.859   | 24.907   | 19.793   | 29.589   | 19.048   | 25.006   |
| Ho               | 54.640           | 46.483   | 56.422   | 45.510    | 50.764    | 12.000             | 11.444    | 7.485     | 10.309    | 9.740    | 10.290   | 11.341   | 9.451    | 7.458    | 10.948   | 7.471    | 9.528    |
| Er               | 241.500          | 192.562  | 236.875  | 218.600   | 222.384   | 65.720             | 65.309    | 40.684    | 57.238    | 48.750   | 51.470   | 50.405   | 42.265   | 35.963   | 49.574   | 34.311   | 44.677   |
| Tm               | 48.840           | 39.832   | 53.078   | 47.200    | 47.238    | 15.990             | 17.681    | 10.508    | 14.726    | 10.510   | 11.210   | 11.863   | 10.063   | 8.227    | 11.497   | 8.404    | 10.253   |
| Yb               | 408.300          | 349.601  | 489.993  | 415.900   | 415.949   | 156.200            | 194.538   | 115.706   | 155.481   | 98.600   | 102.700  | 117.396  | 104.126  | 82.533   | 114.180  | 83.223   | 100.394  |
| Lu               | 72.000           | 60.197   | 79.015   | 76.400    | 71.903    | 30.910             | 33.888    | 21.904    | 28.901    | 19.110   | 20.260   | 18.910   | 16.009   | 13.390   | 18.110   | 13.848   | 17.091   |
| Y                | 1407.000         | 1163.195 | 1358.367 | 1171.000  | 1274.891  | 338.600            | 306.504   | 206.385   | 283.830   | 270.700  | 286.700  | 293.624  | 245.294  | 196.709  | 283.943  | 192.920  | 252.841  |
| Nb               | 33.200           | 28.360   | 22.087   | 14.940    | 24.647    | 4.260              | 4.118     | 2.789     | 3.722     | 0.897    | 0.894    | 0.904    | 0.912    | 0.802    | 1.252    | 0.625    | 0.898    |
| Ta               | 18.680           | 17.190   | 11.942   | 11.090    | 14.726    | 6.620              | 8.882     | 5.658     | 7.053     | 0.637    | 0.629    | 0.678    | 0.694    | 0.576    | 0.870    | 0.508    | 0.656    |
| Ti               | 1.580            | 2.511    | 0.862    | 0.990     | 1.486     | 0.830              | 1.320     | 0.309     | 0.820     | 0.000    | 0.320    | 0.150    | 0.000    | 0.654    | 0.147    | 0.517    | 0.255    |
| Hf               | 11220.000        | 9306.889 | 8682.026 | 10940.000 | 10037.229 | 14220.000          | 10211.752 | 11136.048 | 11855.933 | 6061.000 | 5993.000 | 4614.047 | 4438.822 | 4387.105 | 4511.978 | 4306.550 | 4901.786 |
| Th               | 1290.000         | 1147.565 | 491.007  | 323.700   | 813.068   | 27.180             | 25.186    | 18.388    | 23.585    | 50.320   | 56.210   | 31.188   | 46.004   | 40.377   | 84.448   | 38.667   | 49.602   |
| U                | 957.000          | 882.087  | 801.451  | 601.400   | 810.485   | 122.700            | 186.387   | 94.449    | 134.512   | 111.600  | 118.100  | 96.385   | 116.228  | 103.158  | 164.770  | 100.940  | 115.883  |
| ΣREE             | 1057.335         | 880.456  | 1144.838 | 980.678   | 1015.827  | 315.224            | 353.870   | 216.681   | 295.258   | 220.108  | 230.614  | 249.030  | 214.871  | 174.692  | 243.432  | 173.055  | 215.115  |
| Th/U             | 1.35             | 1.30     | 0.61     | 0.54      | 1.00      | 0.22               | 0.14      | 0.19      | 0.18      | 0.45     | 0.48     | 0.32     | 0.40     | 0.39     | 0.51     | 0.38     | 0.43     |
| Th/Y             | 0.92             | 0.99     | 0.36     | 0.28      | 0.64      | 0.08               | 0.08      | 0.09      | 0.08      | 0.19     | 0.20     | 0.11     | 0.19     | 0.21     | 0.30     | 0.20     | 0.20     |
| Eu/Eu*           | 0.79             | 0.86     | 0.90     | 0.87      | 0.85      | 0.81               | 0.90      | 0.65      | 0.81      | 0.87     | 0.90     | 0.98     | 1.17     | 0.95     | 0.96     | 0.89     | 0.96     |

**Table S3.** (continued)

| Locality Spot | HD-6     |          |          |          |          |          |          |          |          | HD-7     |          |          |          |          |          |          |
|---------------|----------|----------|----------|----------|----------|----------|----------|----------|----------|----------|----------|----------|----------|----------|----------|----------|
|               | HD-6-1   | HD-6-2   | HD-6-3   | HD-6-4   | HD-6-5   | HD-6-6   | HD-6-7   | HD-6-8   | Average  | HD-7-1   | HD-7-2   | HD-7-3   | HD-7-4   | HD-7-5   | HD-7-6   | Average  |
| La            | 0.000    | 0.000    | 0.000    | 0.000    | 0.000    | 0.000    | 0.000    | 0.000    | 0.000    | 0.000    | 0.000    | 0.000    | 0.000    | 0.000    | 0.000    | 0.000    |
| Ce            | 1.123    | 1.684    | 0.806    | 1.070    | 1.321    | 1.065    | 0.749    | 1.346    | 1.145    | 0.515    | 0.393    | 0.568    | 0.437    | 0.335    | 0.480    | 0.455    |
| Pr            | 0.009    | 0.065    | 0.023    | 0.042    | 0.007    | 0.017    | 0.000    | 0.014    | 0.022    | 0.007    | 0.013    | 0.018    | 0.000    | 0.015    | 0.004    | 0.010    |
| Nd            | 0.192    | 0.980    | 0.107    | 0.618    | 0.292    | 0.193    | 0.310    | 0.369    | 0.383    | 0.218    | 0.215    | 0.237    | 0.133    | 0.197    | 0.158    | 0.193    |
| Sm            | 0.781    | 2.900    | 0.996    | 2.056    | 2.231    | 0.943    | 0.780    | 0.725    | 1.427    | 0.660    | 0.630    | 0.545    | 0.420    | 0.584    | 0.439    | 0.546    |
| Eu            | 0.690    | 1.847    | 0.573    | 1.418    | 0.925    | 0.771    | 0.484    | 1.035    | 0.968    | 0.428    | 0.418    | 0.482    | 0.436    | 0.349    | 0.515    | 0.438    |
| Gd            | 6.590    | 15.030   | 5.746    | 10.496   | 9.016    | 6.772    | 4.121    | 9.264    | 8.379    | 3.640    | 3.400    | 4.240    | 3.330    | 2.839    | 4.221    | 3.612    |
| Tb            | 2.895    | 5.800    | 2.302    | 3.852    | 3.973    | 3.046    | 2.296    | 3.878    | 3.505    | 1.580    | 1.399    | 1.847    | 1.284    | 1.248    | 1.622    | 1.497    |
| Dy            | 40.630   | 71.100   | 34.992   | 47.180   | 50.841   | 39.969   | 29.858   | 49.009   | 45.447   | 23.470   | 20.300   | 27.840   | 18.206   | 16.943   | 23.864   | 21.770   |
| Ho            | 15.490   | 23.830   | 14.107   | 16.389   | 19.401   | 15.179   | 12.979   | 19.420   | 17.099   | 10.590   | 8.280    | 11.810   | 8.077    | 6.908    | 10.471   | 9.356    |
| Er            | 77.000   | 109.100  | 68.160   | 72.355   | 86.951   | 72.933   | 62.967   | 87.210   | 79.585   | 61.900   | 47.700   | 65.350   | 43.241   | 34.970   | 53.631   | 51.132   |
| Tm            | 17.480   | 23.700   | 16.175   | 16.054   | 20.248   | 16.985   | 14.950   | 20.364   | 18.244   | 15.530   | 12.180   | 15.690   | 11.406   | 9.081    | 13.586   | 12.912   |
| Yb            | 167.100  | 221.400  | 162.761  | 152.235  | 194.841  | 166.617  | 150.588  | 198.221  | 176.720  | 163.100  | 128.100  | 156.700  | 122.197  | 100.077  | 137.844  | 134.670  |
| Lu            | 32.910   | 41.630   | 33.268   | 29.798   | 39.269   | 33.906   | 28.984   | 37.504   | 34.659   | 34.000   | 27.460   | 31.970   | 27.180   | 22.268   | 29.971   | 28.808   |
| Y             | 412.400  | 621.600  | 367.609  | 410.466  | 501.351  | 404.982  | 351.132  | 506.835  | 447.047  | 308.600  | 241.100  | 340.500  | 225.076  | 186.286  | 285.216  | 264.463  |
| Nb            | 1.202    | 2.350    | 1.558    | 1.534    | 1.558    | 1.199    | 1.485    | 1.629    | 1.564    | 1.384    | 1.047    | 1.544    | 1.111    | 0.698    | 1.299    | 1.181    |
| Ta            | 0.800    | 1.333    | 0.998    | 0.988    | 0.813    | 0.773    | 1.118    | 0.975    | 0.975    | 0.923    | 0.795    | 0.873    | 0.775    | 0.584    | 0.677    | 0.771    |
| Ti            | 0.000    | 0.000    | 0.213    | 0.152    | 0.333    | 0.308    | 0.501    | 0.000    | 0.188    | 0.000    | 0.000    | 0.000    | 0.152    | 0.144    | 0.253    | 0.091    |
| Hf            | 6706.000 | 6075.000 | 6039.136 | 5709.900 | 5885.484 | 6098.986 | 5136.412 | 5135.946 | 5848.358 | 6327.000 | 6429.000 | 6425.000 | 5954.015 | 5660.977 | 5478.713 | 6045.784 |
| Th            | 42.580   | 69.340   | 21.025   | 43.348   | 42.570   | 50.446   | 18.763   | 48.282   | 42.044   | 13.440   | 11.350   | 15.250   | 11.133   | 10.126   | 13.951   | 12.542   |
| U             | 69.310   | 104.100  | 51.488   | 69.979   | 70.871   | 77.759   | 47.071   | 75.443   | 70.753   | 46.370   | 36.160   | 50.470   | 36.875   | 31.794   | 46.414   | 41.347   |
| ΣREE          | 362.890  | 519.066  | 340.015  | 353.563  | 429.315  | 358.395  | 309.066  | 428.360  | 387.584  | 315.638  | 250.488  | 317.297  | 236.347  | 195.815  | 276.806  | 265.399  |
| Th/U          | 0.61     | 0.67     | 0.41     | 0.62     | 0.60     | 0.65     | 0.40     | 0.64     | 0.59     | 0.29     | 0.31     | 0.30     | 0.30     | 0.32     | 0.30     | 0.30     |
| Th/Y          | 0.10     | 0.11     | 0.06     | 0.11     | 0.08     | 0.12     | 0.05     | 0.10     | 0.09     | 0.04     | 0.05     | 0.04     | 0.05     | 0.05     | 0.05     | 0.05     |
| Eu/Eu*        | 0.93     | 0.86     | 0.73     | 0.93     | 0.63     | 0.93     | 0.83     | 1.22     | 0.86     | 0.84     | 0.87     | 0.97     | 1.13     | 0.83     | 1.16     | 0.95     |

**Table S3.** (continued)

| Locality Spot | HD-8     |          |          |          |          |          |          | HD-9     |          |          |          |          |          |          |
|---------------|----------|----------|----------|----------|----------|----------|----------|----------|----------|----------|----------|----------|----------|----------|
|               | HD-8-1   | HD-8-2   | HD-8-3   | HD-8-4   | HD-8-5   | HD-8-6   | Average  | HD-9-1   | HD-9-2   | HD-9-3   | HD-9-4   | HD-9-5   | HD-9-6   | Average  |
| La            | 0.000    | 0.000    | 0.000    | 0.000    | 0.000    | 0.000    | 0.000    | 0.000    | 0.000    | 0.000    | 0.000    | 0.000    | 0.005    | 0.001    |
| Ce            | 0.767    | 0.990    | 0.699    | 0.783    | 0.311    | 0.836    | 0.731    | 0.298    | 0.215    | 0.165    | 0.253    | 0.292    | 0.326    | 0.258    |
| Pr            | 0.009    | 0.007    | 0.010    | 0.000    | 0.004    | 0.006    | 0.006    | 0.000    | 0.031    | 0.013    | 0.003    | 0.000    | 0.007    | 0.009    |
| Nd            | 0.173    | 0.169    | 0.147    | 0.208    | 0.002    | 0.344    | 0.174    | 0.112    | 0.104    | 0.051    | 0.060    | 0.034    | 0.100    | 0.077    |
| Sm            | 0.501    | 0.520    | 0.478    | 0.444    | 0.413    | 0.511    | 0.478    | 0.303    | 0.301    | 0.202    | 0.278    | 0.320    | 0.349    | 0.292    |
| Eu            | 0.362    | 0.484    | 0.323    | 0.496    | 0.127    | 0.378    | 0.362    | 0.224    | 0.269    | 0.260    | 0.269    | 0.221    | 0.295    | 0.256    |
| Gd            | 4.210    | 5.320    | 3.124    | 4.171    | 1.997    | 4.511    | 3.889    | 2.260    | 1.763    | 1.930    | 2.222    | 2.084    | 2.162    | 2.070    |
| Tb            | 2.083    | 2.835    | 1.984    | 2.266    | 0.999    | 2.374    | 2.090    | 1.037    | 0.906    | 0.775    | 0.989    | 0.937    | 1.170    | 0.969    |
| Dy            | 34.830   | 47.470   | 31.060   | 38.581   | 15.210   | 38.881   | 34.339   | 14.120   | 12.651   | 11.204   | 12.848   | 12.800   | 15.490   | 13.185   |
| Ho            | 15.780   | 20.570   | 14.225   | 17.212   | 6.888    | 16.504   | 15.196   | 5.690    | 4.732    | 4.782    | 5.181    | 5.001    | 5.924    | 5.218    |
| Er            | 90.000   | 114.400  | 78.232   | 89.582   | 36.517   | 86.170   | 82.484   | 29.830   | 25.376   | 23.386   | 27.253   | 24.476   | 29.379   | 26.617   |
| Tm            | 22.410   | 27.630   | 19.503   | 21.958   | 9.115    | 21.925   | 20.423   | 6.960    | 5.908    | 6.044    | 6.656    | 6.106    | 7.460    | 6.523    |
| Yb            | 220.400  | 265.300  | 201.323  | 222.641  | 103.993  | 216.230  | 204.981  | 70.800   | 61.289   | 65.396   | 70.566   | 63.118   | 76.560   | 67.955   |
| Lu            | 43.780   | 52.130   | 40.626   | 44.022   | 19.505   | 40.436   | 40.083   | 14.280   | 12.952   | 12.231   | 14.543   | 13.014   | 15.903   | 13.821   |
| Y             | 450.300  | 582.000  | 394.501  | 462.260  | 187.032  | 463.447  | 423.257  | 158.600  | 138.359  | 129.830  | 141.554  | 138.631  | 162.546  | 144.920  |
| Nb            | 3.040    | 4.040    | 2.325    | 2.661    | 0.660    | 3.181    | 2.651    | 0.424    | 0.384    | 0.524    | 0.406    | 0.430    | 0.368    | 0.423    |
| Ta            | 1.347    | 1.448    | 1.208    | 1.309    | 0.397    | 1.351    | 1.177    | 0.308    | 0.285    | 0.280    | 0.283    | 0.323    | 0.299    | 0.296    |
| Ti            | 2.570    | 2.760    | 2.360    | 2.124    | 1.457    | 3.047    | 2.386    | 0.000    | 0.211    | 0.203    | 0.000    | 0.419    | 0.162    | 0.166    |
| Hf            | 6642.000 | 6506.000 | 6157.474 | 5973.829 | 5083.305 | 4812.302 | 5862.485 | 6119.000 | 5381.589 | 4440.544 | 5439.134 | 5522.057 | 5417.715 | 5386.673 |
| Th            | 29.740   | 41.170   | 28.091   | 33.435   | 9.419    | 36.311   | 29.694   | 8.670    | 11.941   | 11.408   | 13.038   | 11.615   | 9.825    | 11.083   |
| U             | 73.450   | 92.700   | 69.787   | 80.235   | 27.010   | 81.415   | 70.766   | 31.220   | 38.374   | 37.951   | 40.505   | 37.490   | 34.238   | 36.629   |
| ΣREE          | 435.305  | 537.825  | 391.735  | 442.363  | 195.082  | 429.106  | 405.236  | 145.914  | 126.497  | 126.438  | 141.122  | 128.403  | 155.130  | 137.251  |
| Th/U          | 0.40     | 0.44     | 0.40     | 0.42     | 0.35     | 0.45     | 0.42     | 0.28     | 0.31     | 0.30     | 0.32     | 0.31     | 0.29     | 0.30     |
| Th/Y          | 0.07     | 0.07     | 0.07     | 0.07     | 0.05     | 0.08     | 0.07     | 0.05     | 0.09     | 0.09     | 0.09     | 0.08     | 0.06     | 0.08     |
| Eu/Eu*        | 0.76     | 0.89     | 0.81     | 1.11     | 0.43     | 0.76     | 0.81     | 0.83     | 1.13     | 1.28     | 1.05     | 0.83     | 1.04     | 1.01     |

**Table S3.** (continued)

| Locality<br>Spot | HD-10    |          |          |          |          |          |          | HD-11    |          |          |          |          |          |
|------------------|----------|----------|----------|----------|----------|----------|----------|----------|----------|----------|----------|----------|----------|
|                  | HD-10-1  | HD-10-2  | HD-10-3  | HD-10-4  | HD-10-5  | HD-10-6  | Average  | HD-11-1  | HD-11-2  | HD-11-3  | HD-11-4  | HD-11-5  | Average  |
| La               | 0.000    | 0.000    | 0.005    | 0.000    | 0.000    | 0.000    | 0.001    | 0.000    | 0.003    | 0.000    | 0.003    | 0.000    | 0.001    |
| Ce               | 0.522    | 0.898    | 0.882    | 0.919    | 1.078    | 0.804    | 0.851    | 0.861    | 1.108    | 0.966    | 0.909    | 0.734    | 0.916    |
| Pr               | 0.007    | 0.013    | 0.016    | 0.031    | 0.015    | 0.000    | 0.014    | 0.000    | 0.014    | 0.008    | 0.015    | 0.005    | 0.009    |
| Nd               | 0.124    | 0.217    | 0.367    | 0.274    | 0.279    | 0.154    | 0.236    | 0.187    | 0.122    | 0.258    | 0.206    | 0.043    | 0.163    |
| Sm               | 0.518    | 0.780    | 0.962    | 0.802    | 1.030    | 0.536    | 0.771    | 0.641    | 0.362    | 0.519    | 0.427    | 0.415    | 0.473    |
| Eu               | 0.374    | 0.671    | 0.629    | 0.728    | 0.707    | 0.515    | 0.604    | 0.440    | 0.262    | 0.390    | 0.276    | 0.240    | 0.322    |
| Gd               | 3.440    | 6.350    | 5.840    | 5.644    | 7.140    | 4.683    | 5.516    | 4.683    | 2.403    | 3.119    | 2.501    | 2.085    | 2.958    |
| Tb               | 1.563    | 2.645    | 2.811    | 2.327    | 3.135    | 2.068    | 2.425    | 2.075    | 1.308    | 1.354    | 1.180    | 1.045    | 1.392    |
| Dy               | 21.700   | 37.830   | 34.388   | 33.046   | 42.480   | 27.854   | 32.883   | 23.150   | 15.656   | 16.875   | 14.055   | 14.521   | 16.851   |
| Ho               | 8.710    | 15.020   | 14.329   | 12.351   | 16.860   | 11.170   | 13.073   | 8.597    | 5.679    | 5.751    | 4.902    | 5.177    | 6.021    |
| Er               | 44.700   | 74.700   | 66.686   | 58.109   | 83.100   | 52.300   | 63.266   | 35.731   | 23.394   | 26.667   | 21.009   | 23.160   | 25.992   |
| Tm               | 9.790    | 16.100   | 14.719   | 13.092   | 17.620   | 11.658   | 13.830   | 7.015    | 4.877    | 5.864    | 4.237    | 4.954    | 5.389    |
| Yb               | 91.500   | 144.400  | 137.654  | 129.135  | 156.200  | 111.019  | 128.318  | 64.030   | 38.722   | 53.230   | 37.396   | 43.645   | 47.405   |
| Lu               | 17.400   | 27.430   | 25.523   | 20.955   | 29.530   | 21.674   | 23.752   | 11.996   | 6.826    | 10.530   | 6.650    | 7.917    | 8.784    |
| Y                | 239.400  | 405.100  | 368.153  | 321.234  | 452.600  | 292.217  | 346.451  | 227.193  | 166.041  | 182.269  | 151.656  | 158.024  | 177.036  |
| Nb               | 0.623    | 1.363    | 1.214    | 1.170    | 1.742    | 0.965    | 1.179    | 0.465    | 0.542    | 0.605    | 0.593    | 0.257    | 0.492    |
| Ta               | 0.486    | 0.812    | 0.811    | 0.726    | 0.934    | 0.572    | 0.723    | 0.373    | 0.298    | 0.375    | 0.302    | 0.174    | 0.304    |
| Ti               | 0.000    | 0.310    | 0.473    | 0.258    | 0.000    | 0.000    | 0.174    | 0.439    | 0.910    | 0.000    | 0.439    | 0.362    | 0.430    |
| Hf               | 6052.000 | 5946.000 | 5396.405 | 4085.616 | 5883.000 | 5287.458 | 5441.746 | 5209.468 | 5094.918 | 5023.299 | 5157.382 | 5565.361 | 5210.086 |
| Th               | 25.600   | 73.400   | 71.732   | 66.807   | 91.100   | 46.894   | 62.589   | 22.638   | 10.330   | 11.477   | 10.071   | 7.066    | 12.316   |
| U                | 56.700   | 112.100  | 112.096  | 111.405  | 129.100  | 85.852   | 101.209  | 48.441   | 19.367   | 19.865   | 17.725   | 15.770   | 24.233   |
| ΣREE             | 200.348  | 327.054  | 304.811  | 277.413  | 359.174  | 244.436  | 285.539  | 159.406  | 100.735  | 125.531  | 93.768   | 103.939  | 116.676  |
| Th/U             | 0.45     | 0.65     | 0.64     | 0.60     | 0.71     | 0.55     | 0.62     | 0.47     | 0.53     | 0.58     | 0.57     | 0.45     | 0.51     |
| Th/Y             | 0.11     | 0.18     | 0.19     | 0.21     | 0.20     | 0.16     | 0.18     | 0.10     | 0.06     | 0.06     | 0.07     | 0.04     | 0.07     |
| Eu/Eu*           | 0.86     | 0.92     | 0.81     | 1.05     | 0.80     | 0.99     | 0.90     | 0.78     | 0.86     | 0.94     | 0.82     | 0.79     | 0.83     |

Table S3. (continued)

| Locality<br>Spot | HD-12    |          |          |          |          |          |          | HD-13    |          |          |          |          |          |          |          |
|------------------|----------|----------|----------|----------|----------|----------|----------|----------|----------|----------|----------|----------|----------|----------|----------|
|                  | HD-12-1  | HD-12-2  | HD-12-3  | HD-12-4  | HD-12-5  | HD-12-6  | Average  | HD-13-1  | HD-13-2  | HD-13-3  | HD-13-4  | HD-13-5  | HD-13-6  | HD-13-7  | Average  |
| La               | 0.000    | 0.000    | 0.000    | 0.000    | 0.000    | 0.000    | 0.000    | 0.000    | 0.000    | 0.000    | 0.000    | 0.000    | 0.003    | 0.007    | 0.001    |
| Ce               | 0.478    | 0.472    | 0.423    | 0.334    | 0.455    | 0.509    | 0.445    | 0.784    | 0.753    | 0.914    | 0.981    | 1.561    | 0.954    | 1.129    | 1.011    |
| Pr               | 0.007    | 0.008    | 0.010    | 0.007    | 0.004    | 0.005    | 0.007    | 0.011    | 0.016    | 0.003    | 0.008    | 0.024    | 0.011    | 0.018    | 0.013    |
| Nd               | 0.141    | 0.074    | 0.096    | 0.067    | 0.085    | 0.165    | 0.105    | 0.216    | 0.111    | 0.118    | 0.103    | 0.184    | 0.130    | 0.087    | 0.136    |
| Sm               | 0.263    | 0.326    | 0.353    | 0.222    | 0.461    | 0.332    | 0.326    | 0.415    | 0.368    | 0.345    | 0.601    | 0.678    | 0.560    | 0.360    | 0.475    |
| Eu               | 0.223    | 0.218    | 0.240    | 0.176    | 0.285    | 0.176    | 0.220    | 0.363    | 0.286    | 0.333    | 0.500    | 0.636    | 0.445    | 0.320    | 0.412    |
| Gd               | 2.286    | 1.991    | 2.229    | 1.645    | 2.224    | 2.267    | 2.107    | 2.887    | 2.678    | 3.374    | 3.342    | 5.718    | 4.199    | 3.750    | 3.707    |
| Tb               | 1.065    | 0.901    | 1.014    | 0.778    | 0.947    | 0.964    | 0.945    | 1.570    | 1.804    | 2.067    | 2.213    | 3.207    | 2.520    | 2.581    | 2.280    |
| Dy               | 14.287   | 13.010   | 13.973   | 10.774   | 13.579   | 12.106   | 12.955   | 26.867   | 27.760   | 34.043   | 35.274   | 48.290   | 39.712   | 39.396   | 35.906   |
| Ho               | 6.457    | 5.388    | 5.561    | 4.816    | 5.516    | 5.277    | 5.502    | 13.003   | 12.884   | 15.407   | 16.041   | 19.981   | 17.347   | 17.510   | 16.025   |
| Er               | 33.592   | 27.205   | 28.288   | 24.035   | 28.348   | 26.434   | 27.984   | 81.882   | 79.702   | 85.726   | 90.750   | 108.643  | 96.379   | 97.530   | 91.516   |
| Tm               | 8.355    | 6.563    | 6.757    | 5.995    | 6.876    | 6.587    | 6.856    | 23.140   | 21.670   | 23.066   | 23.289   | 27.558   | 24.882   | 25.293   | 24.128   |
| Yb               | 86.711   | 68.592   | 71.983   | 61.144   | 69.307   | 62.016   | 69.959   | 259.475  | 241.837  | 243.986  | 252.997  | 280.704  | 260.458  | 262.111  | 257.367  |
| Lu               | 18.555   | 14.192   | 15.323   | 13.588   | 14.966   | 13.198   | 14.971   | 59.415   | 54.118   | 52.323   | 54.215   | 58.398   | 55.165   | 55.494   | 55.590   |
| Y                | 179.223  | 146.580  | 154.775  | 131.603  | 152.384  | 142.532  | 151.183  | 405.238  | 400.169  | 460.358  | 481.427  | 592.828  | 516.516  | 522.890  | 482.775  |
| Nb               | 0.604    | 0.389    | 0.393    | 0.389    | 0.406    | 0.401    | 0.430    | 1.453    | 1.489    | 1.266    | 1.340    | 2.381    | 1.696    | 1.647    | 1.610    |
| Ta               | 0.432    | 0.340    | 0.328    | 0.299    | 0.326    | 0.272    | 0.333    | 1.151    | 0.913    | 0.851    | 0.920    | 1.406    | 0.920    | 1.039    | 1.028    |
| Ti               | 0.531    | 0.000    | 0.621    | 0.201    | 0.424    | 0.000    | 0.296    | 0.211    | 0.177    | 0.556    | 0.595    | 0.225    | 0.293    | 0.435    | 0.356    |
| Hf               | 5691.479 | 6026.995 | 5812.594 | 5771.247 | 6246.029 | 5836.514 | 5897.476 | 6682.308 | 6594.393 | 6482.997 | 6441.341 | 6411.995 | 6391.984 | 6291.100 | 6470.874 |
| Th               | 16.247   | 8.616    | 9.334    | 7.488    | 9.365    | 8.148    | 9.866    | 26.814   | 30.814   | 47.104   | 51.422   | 221.150  | 61.772   | 77.262   | 73.763   |
| U                | 41.962   | 23.129   | 26.697   | 24.102   | 24.062   | 23.180   | 27.189   | 55.849   | 57.440   | 81.259   | 85.964   | 204.163  | 97.980   | 107.613  | 98.610   |
| ΣREE             | 172.421  | 138.940  | 146.250  | 123.581  | 143.053  | 130.037  | 142.380  | 470.028  | 443.987  | 461.704  | 480.316  | 555.582  | 502.766  | 505.585  | 488.567  |
| Th/U             | 0.39     | 0.37     | 0.35     | 0.31     | 0.39     | 0.35     | 0.36     | 0.48     | 0.54     | 0.58     | 0.60     | 1.08     | 0.63     | 0.72     | 0.75     |
| Th/Y             | 0.09     | 0.06     | 0.06     | 0.06     | 0.06     | 0.06     | 0.07     | 0.07     | 0.08     | 0.10     | 0.11     | 0.37     | 0.12     | 0.15     | 0.15     |
| Eu/Eu*           | 0.88     | 0.83     | 0.83     | 0.89     | 0.86     | 0.62     | 0.81     | 1.01     | 0.88     | 0.94     | 1.08     | 0.99     | 0.89     | 0.84     | 0.95     |

Table S3. (continued)

| Locality<br>Spot | HD-14    |          |          |          |          |          |          | HD-15    |          |          |          |          |          |          |
|------------------|----------|----------|----------|----------|----------|----------|----------|----------|----------|----------|----------|----------|----------|----------|
|                  | HD-14-1  | HD-14-2  | HD-14-3  | HD-14-4  | HD-14-5  | HD-14-6  | Average  | HD-15-1  | HD-15-2  | HD-15-3  | HD-15-4  | HD-15-5  | HD-15-6  | Average  |
| La               | 0.000    | 0.000    | 0.000    | 0.000    | 0.000    | 0.010    | 0.002    | 0.000    | 0.000    | 0.035    | 0.000    | 0.005    | 0.003    | 0.007    |
| Ce               | 0.583    | 0.786    | 0.708    | 0.909    | 0.594    | 0.458    | 0.673    | 1.085    | 0.588    | 0.359    | 0.393    | 0.439    | 0.873    | 0.623    |
| Pr               | 0.020    | 0.000    | 0.024    | 0.025    | 0.023    | 0.007    | 0.017    | 0.012    | 0.023    | 0.005    | 0.005    | 0.000    | 0.012    | 0.009    |
| Nd               | 0.166    | 0.310    | 0.370    | 0.397    | 0.223    | 0.151    | 0.269    | 0.190    | 0.118    | 0.041    | 0.106    | 0.113    | 0.118    | 0.114    |
| Sm               | 0.543    | 0.662    | 0.689    | 1.006    | 0.613    | 0.526    | 0.673    | 0.512    | 0.428    | 0.145    | 0.282    | 0.317    | 0.303    | 0.331    |
| Eu               | 0.594    | 0.584    | 0.580    | 0.656    | 0.519    | 0.379    | 0.552    | 0.351    | 0.296    | 0.107    | 0.163    | 0.144    | 0.365    | 0.238    |
| Gd               | 4.791    | 5.730    | 4.971    | 5.421    | 4.770    | 3.058    | 4.790    | 3.609    | 2.452    | 1.208    | 1.723    | 1.636    | 2.751    | 2.230    |
| Tb               | 2.218    | 2.760    | 2.365    | 2.667    | 2.004    | 1.380    | 2.233    | 1.547    | 1.301    | 0.516    | 0.850    | 0.708    | 1.341    | 1.044    |
| Dy               | 29.198   | 33.133   | 30.065   | 35.870   | 25.726   | 19.791   | 28.964   | 22.212   | 17.331   | 6.675    | 12.510   | 10.832   | 17.453   | 14.502   |
| Ho               | 11.616   | 13.291   | 12.348   | 14.490   | 10.298   | 7.998    | 11.674   | 9.115    | 7.316    | 3.145    | 5.618    | 4.693    | 6.829    | 6.119    |
| Er               | 58.976   | 65.839   | 62.847   | 73.795   | 53.047   | 39.332   | 58.973   | 43.976   | 37.927   | 17.610   | 28.971   | 25.561   | 36.294   | 31.723   |
| Tm               | 13.994   | 15.462   | 14.880   | 17.047   | 12.707   | 9.794    | 13.981   | 10.349   | 9.263    | 4.574    | 7.697    | 7.057    | 8.422    | 7.894    |
| Yb               | 138.908  | 152.131  | 149.792  | 171.514  | 134.716  | 97.269   | 140.722  | 101.590  | 96.933   | 50.727   | 88.260   | 79.537   | 81.284   | 83.055   |
| Lu               | 29.980   | 32.911   | 32.726   | 35.916   | 30.232   | 21.220   | 30.498   | 20.885   | 21.005   | 11.705   | 19.629   | 17.463   | 16.945   | 17.939   |
| Y                | 322.930  | 360.665  | 340.304  | 413.392  | 286.519  | 220.998  | 324.135  | 259.576  | 210.311  | 94.939   | 163.789  | 146.161  | 203.077  | 179.642  |
| Nb               | 1.044    | 0.944    | 1.638    | 1.875    | 1.284    | 0.938    | 1.287    | 0.655    | 0.806    | 0.611    | 1.025    | 0.648    | 0.542    | 0.714    |
| Ta               | 0.676    | 0.814    | 0.991    | 0.958    | 0.868    | 0.609    | 0.819    | 0.577    | 0.733    | 0.521    | 0.911    | 0.565    | 0.377    | 0.614    |
| Ti               | 0.110    | 0.259    | 0.116    | 0.000    | 0.071    | 0.227    | 0.131    | 0.000    | 0.275    | 0.000    | 0.000    | 0.171    | 0.446    | 0.149    |
| Hf               | 5591.489 | 5634.438 | 5411.749 | 5614.535 | 5329.105 | 5862.203 | 5573.920 | 6877.585 | 8500.255 | 8557.894 | 9591.593 | 7853.415 | 6488.881 | 7978.271 |
| Th               | 20.185   | 24.007   | 18.509   | 21.639   | 16.452   | 11.367   | 18.693   | 17.686   | 26.390   | 12.021   | 24.880   | 21.698   | 14.690   | 19.560   |
| U                | 58.019   | 65.325   | 61.448   | 66.399   | 50.700   | 35.689   | 56.263   | 41.886   | 65.782   | 37.726   | 68.656   | 52.767   | 33.397   | 50.036   |
| ΣREE             | 291.589  | 323.599  | 312.366  | 359.714  | 275.473  | 201.376  | 294.019  | 215.431  | 194.982  | 96.851   | 166.206  | 148.505  | 172.992  | 165.828  |
| Th/U             | 0.35     | 0.37     | 0.30     | 0.33     | 0.32     | 0.32     | 0.33     | 0.42     | 0.40     | 0.32     | 0.36     | 0.41     | 0.44     | 0.39     |
| Th/Y             | 0.06     | 0.07     | 0.05     | 0.05     | 0.06     | 0.05     | 0.06     | 0.07     | 0.13     | 0.13     | 0.15     | 0.15     | 0.07     | 0.11     |
| Eu/Eu*           | 1.13     | 0.92     | 0.96     | 0.86     | 0.93     | 0.91     | 0.94     | 0.79     | 0.88     | 0.78     | 0.72     | 0.61     | 1.22     | 0.85     |

| Locality<br>Spot | HD-16    |          |          |          |          |          | Average  |
|------------------|----------|----------|----------|----------|----------|----------|----------|
|                  | HD-16-1  | HD-16-2  | HD-16-3  | HD-16-4  | HD-16-5  | HD-16-6  |          |
| La               | 0.010    | 0.000    | 0.000    | 0.003    | 0.000    | 0.000    | 0.002    |
| Ce               | 0.815    | 0.541    | 0.884    | 1.051    | 0.960    | 0.943    | 0.866    |
| Pr               | 0.000    | 0.001    | 0.018    | 0.005    | 0.007    | 0.020    | 0.008    |
| Nd               | 0.126    | 0.088    | 0.425    | 0.313    | 0.171    | 0.211    | 0.222    |
| Sm               | 0.386    | 0.358    | 0.713    | 0.517    | 0.379    | 0.993    | 0.558    |
| Eu               | 0.378    | 0.246    | 0.736    | 0.635    | 0.399    | 0.797    | 0.532    |
| Gd               | 3.172    | 2.269    | 5.852    | 5.624    | 3.758    | 7.075    | 4.625    |
| Tb               | 1.717    | 1.170    | 2.615    | 2.794    | 1.716    | 2.670    | 2.114    |
| Dy               | 27.351   | 16.606   | 34.418   | 39.023   | 22.844   | 36.388   | 29.438   |
| Ho               | 11.859   | 8.320    | 12.892   | 16.405   | 9.299    | 13.767   | 12.090   |
| Er               | 62.416   | 48.361   | 61.280   | 80.433   | 48.285   | 63.811   | 60.765   |
| Tm               | 15.049   | 12.398   | 13.915   | 18.552   | 12.011   | 14.490   | 14.402   |
| Yb               | 148.181  | 131.088  | 132.578  | 176.640  | 119.644  | 137.023  | 140.859  |
| Lu               | 30.264   | 28.078   | 26.338   | 35.926   | 26.378   | 27.329   | 29.052   |
| Y                | 330.765  | 234.076  | 343.686  | 438.333  | 251.773  | 352.094  | 325.121  |
| Nb               | 1.923    | 1.310    | 1.561    | 1.431    | 1.236    | 1.809    | 1.545    |
| Ta               | 0.900    | 0.961    | 0.999    | 0.788    | 0.717    | 0.985    | 0.892    |
| Ti               | 0.732    | 0.666    | 0.816    | 1.188    | 0.538    | 0.728    | 0.778    |
| Hf               | 5487.758 | 5480.238 | 5163.074 | 5465.955 | 5514.622 | 5139.895 | 5375.257 |
| Th               | 26.306   | 18.861   | 56.154   | 50.889   | 27.371   | 59.847   | 39.905   |
| U                | 44.648   | 35.253   | 62.187   | 59.613   | 34.988   | 66.136   | 50.471   |
| ΣREE             | 301.726  | 249.523  | 292.664  | 377.921  | 245.852  | 305.516  | 295.534  |
| Th/U             | 0.59     | 0.54     | 0.90     | 0.85     | 0.78     | 0.90     | 0.79     |
| Th/Y             | 0.08     | 0.08     | 0.16     | 0.12     | 0.11     | 0.17     | 0.12     |
| Eu/Eu*           | 1.04     | 0.83     | 1.10     | 1.14     | 1.02     | 0.92     | 1.01     |
